# Supplementary material
Source: PubMed Central journal article supplement (PMC4030102)
Supplement: mmc1.pdf [file mmc1.pdf]

## Supplementary webappendix

This webappendix formed part of the original submission and has been peer reviewed. We post it as supplied by the authors.

Supplement to: Grad YH, Kirkcaldy RD, Trees D, et al. Genomic epidemiology of *Neisseria gonorrhoeae* with reduced susceptibility to cefixime in the USA: a retrospective observational study. *Lancet Infect Dis* 2014; published online January 22. [http://dx.doi.org/10.1016/S1473-3099\(13\)70693-5](http://dx.doi.org/10.1016/S1473-3099(13)70693-5).

## Supplemental text to “Genomic epidemiology of *Neisseria gonorrhoeae* with reduced susceptibility to cefixime in the United States”

Yonatan H. Grad<sup>1,2</sup>, Robert D. Kirkcaldy<sup>3</sup>, David Trees<sup>3</sup>, Janina Dordel<sup>4</sup>, Simon R. Harris<sup>4</sup>, Edward Goldstein<sup>1</sup>, Hillard Weinstock<sup>3</sup>, Julian Parkhill<sup>4</sup>, William P. Hanage<sup>1</sup>, Stephen Bentley<sup>4,5</sup>, Marc Lipsitch<sup>1,6</sup>

### Affiliations:

1. Center for Communicable Disease Dynamics, Department of Epidemiology, Harvard School of Public Health, Boston MA, USA
2. Division of Infectious Diseases, Brigham and Women’s Hospital, Harvard Medical School, Boston MA, USA
3. Centers for Disease Control and Prevention, Atlanta GA, USA
4. Wellcome Trust Sanger Institute, Hinxton UK
5. Department of Medicine, University of Cambridge, Addenbrookes Hospital, Cambridge, UK
6. Department of Immunology and Infectious Diseases, Harvard School of Public Health, Boston MA, USA

## METHODS

### *Sample preparation*

*Neisseria gonorrhoeae* isolates for MIC determination and DNA isolation were cultivated on GC Base agar (Difco/BD, Franklin Lakes, NJ) supplemented with 1% IsoVitaleX (BBL/BD, Franklin Lakes, NJ) with incubation at 35°C in 5·0% CO<sub>2</sub>. Whole chromosomal DNA was isolated using the ArchivePure DNA purification kit Protocol 18 (5PRIME GbmH, Gaithersburg, MD) as described by the manufacturer with the following modifications: 1/3 of a 10 µl loop of overnight growth was suspended in 300 µl cell lysis solution, incubated at 56°C for 30 minutes, with centrifugation time increased to 4 minutes in the protein precipitation step. In the DNA precipitation, the protocol was modified in that the tube was spun down briefly to facilitate removal of remaining ethanol. In the DNA hydration step, the rehydration time was changed to 1 h 15 minutes at 56°C.

### *MIC determination by agar dilution and Etest*

Agar plate dilution MIC values were determined and interpreted as previously described (see <http://www.cdc.gov/std/gisp/GISP-Protocol07-15-2010.pdf>).

### *Genome comparison visualizations*

Pairwise comparisons of gonococcal genomes, as shown in Supplemental Figure S12, were visualized using the Artemis Comparison Tool.

## RESULTS

### *Comparison to MLST and NG-MAST*

Comparison of the whole-genome phylogeny with multilocus typing schemes, MLST and NG-MAST, which are based on 7 housekeeping loci and two hypervariable genes (*porB* and *tbpB*), respectively, shows that the cef<sup>RS</sup> isolates include many sequence types (Supplemental Figure S2). Among the cef<sup>RS</sup>, MLST 1901 and NG-MAST 1407 are the most common sequence types. However, while MLST 1901 comprises 73% of cef<sup>RS</sup>, it also comprises the plurality (47%) of cefixime susceptible isolates. NG-MAST1407 represents 38% of the cef<sup>RS</sup> isolates and is, along with NG-MAST 2992, the largest single NG-MAST type among the cefixime susceptible isolates (both 9·3%). As expected, both typing schemes are incapable of capturing the resolution attainable from whole genome-based methods (Supplemental Figure S2 and

Supplemental Table S2). Genome sequencing also reveals the limits of NG-MAST, as *tbpB* is a null allele in one cluster of isolates due to presence of an *N. meningitidis* *tbpB* that lack the PCR primer target sequences at this locus (Supplemental Figure S11).

#### *Interspecies mosaicism*

*Neisseria* are known to undergo interspecies recombination. Evidence for this process in *N. gonorrhoeae* includes mosaic *penA* alleles and the novel *penA* alleles described below, as well as the suspected recombination with *N. meningitidis* *tbpB*. Of the predicted recombinant regions in this dataset at least 50 bp in length and with unique matches in the *de novo* assembled genomes, 6.0% match most closely to non-gonococcal *Neisseria* species based on comparison to the nt database. Additional loci that appear to have been shared among *Neisseria* include DhpS, involved in sulfonamide resistance, and regions of the *lgt* locus, involved in production of lipooligosaccharide.

#### *penA* genotype – phenotype correlation and MIC retesting

Seven isolates initially reported as susceptible carry mosaic *penA* XXXIV, one isolate (GCGS126) with mosaic *penA* XXXIV varying by a single amino acid substitution (E101D) was initially reported as susceptible, and two isolates initially reported as *cef<sup>RS</sup>* were found to have the same *penA* amino acid sequences as susceptible isolates. On rechecking MICs for each of these isolates by agar dilution, isolates with *penA* XXXIV and the isolate with a single amino acid substitution were determined to have MICs of 0.125 mg/mL, with the exception of two isolates, GCGS046 and GCGS048, which remained were 0.06 mg/mL and 0.03 mg/mL, respectively, and that the two isolates initially reported as *cef<sup>RS</sup>* that share *penA* alleles with susceptible isolates are in fact susceptible to cefixime (MICs decreased from 0.25 mg/mL to 0.03-0.06 mg/mL; Supplemental Table S2). The *penA* allele in GCGS126 (with MIC of 0.125 mg/mL) differs from mosaic *penA* XXXIV by only one amino acid, but there are a total of 8 nucleotide differences (7 synonymous substitutions) also mostly clustered in the C-terminal transpeptidase domain, suggesting a likely recombination event.

1. Carver TJ, Rutherford KM, Berriman M, Rajandream MA, Barrell BG, Parkhill J. ACT: the Artemis Comparison Tool. *Bioinformatics*. 2005; **21**(16): 3422-3.

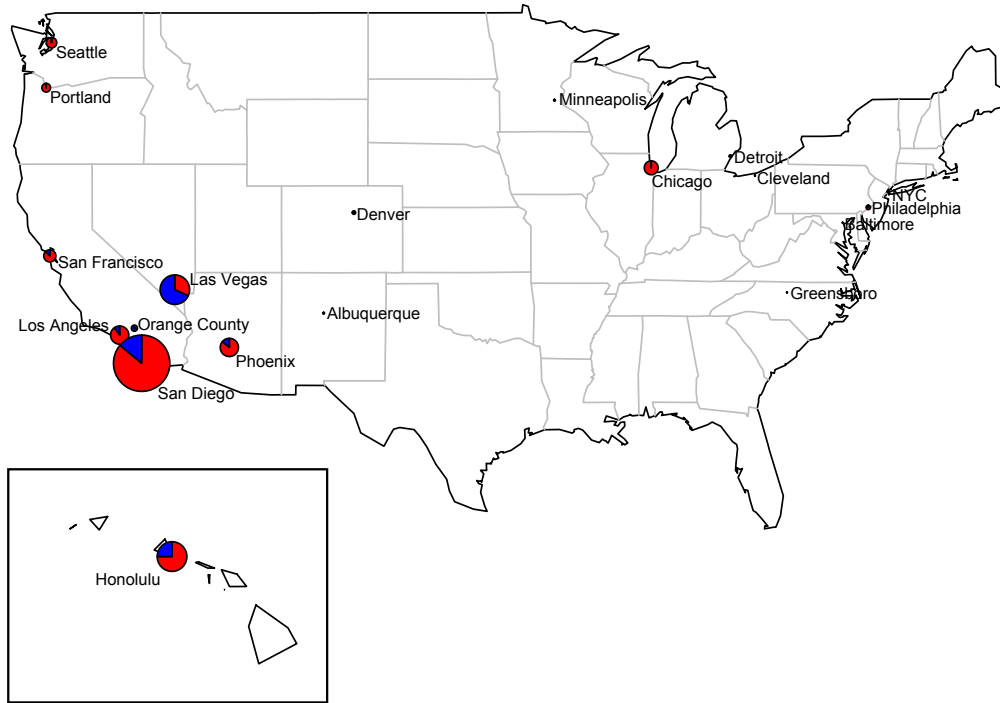

**Figure S1. Map of clinic locations contributing isolates to this study.** The size of the pie charts is proportional to the number of isolates from each location; blue represents the fraction of isolates from self-identified MSM and red from MSM.

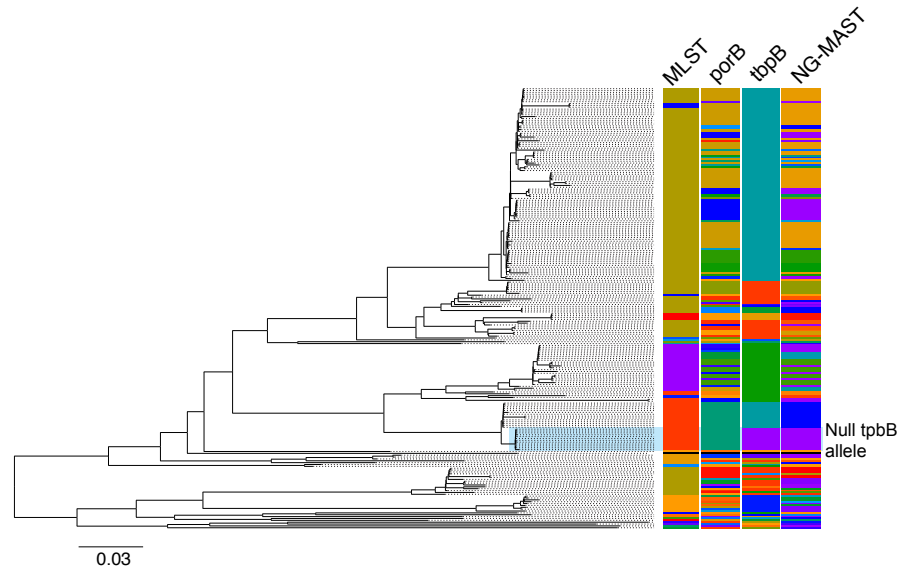

**Figure S2. Maximum likelihood phylogeny from whole genome SNPs from the 236 isolates and the reference genome.** The *in silico* determined MLST, *porB*, *tbpB*, and NG-MAST types are denoted in the columns as labeled. Highlighted in the blue rectangle is a branch of isolates with a null *tbpB* allele; the common ancestor of these isolates underwent recombination replacing the *N. gonorrhoeae* *tbpB* with the *tbpB* locus from *N. meningitidis* (see Supplemental Figure S11). Full listings of MLST and NG-MAST types are in Supplemental Table S1.

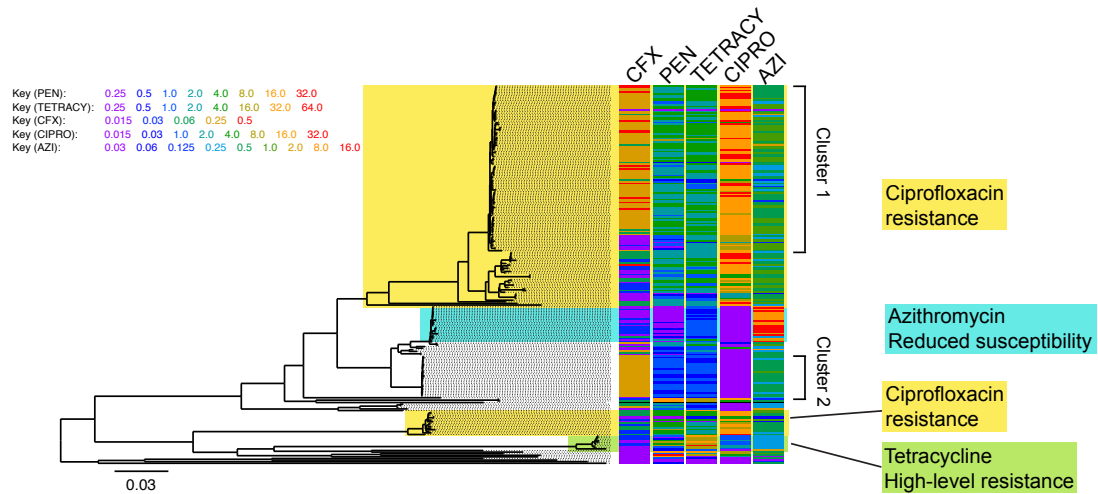

**Figure S3. Maximum likelihood phylogeny from core genome SNPs (predicted recombinant regions removed) and MICs for penicillin, tetracycline, cefixime, ciprofloxacin, and azithromycin.** Blue and green rectangles highlight branches of the tree that are notable for sharing elevated MICs, including clusters with resistance to ciprofloxacin (MIC  $\geq$  1 mg/mL), high level resistance to tetracycline (MIC  $\geq$  16 mg/mL), and reduced susceptibility to azithromycin (MIC  $\geq$  2 mg/mL). Clusters of isolates with reduced susceptibility to cefixime are not highlighted on this figure.

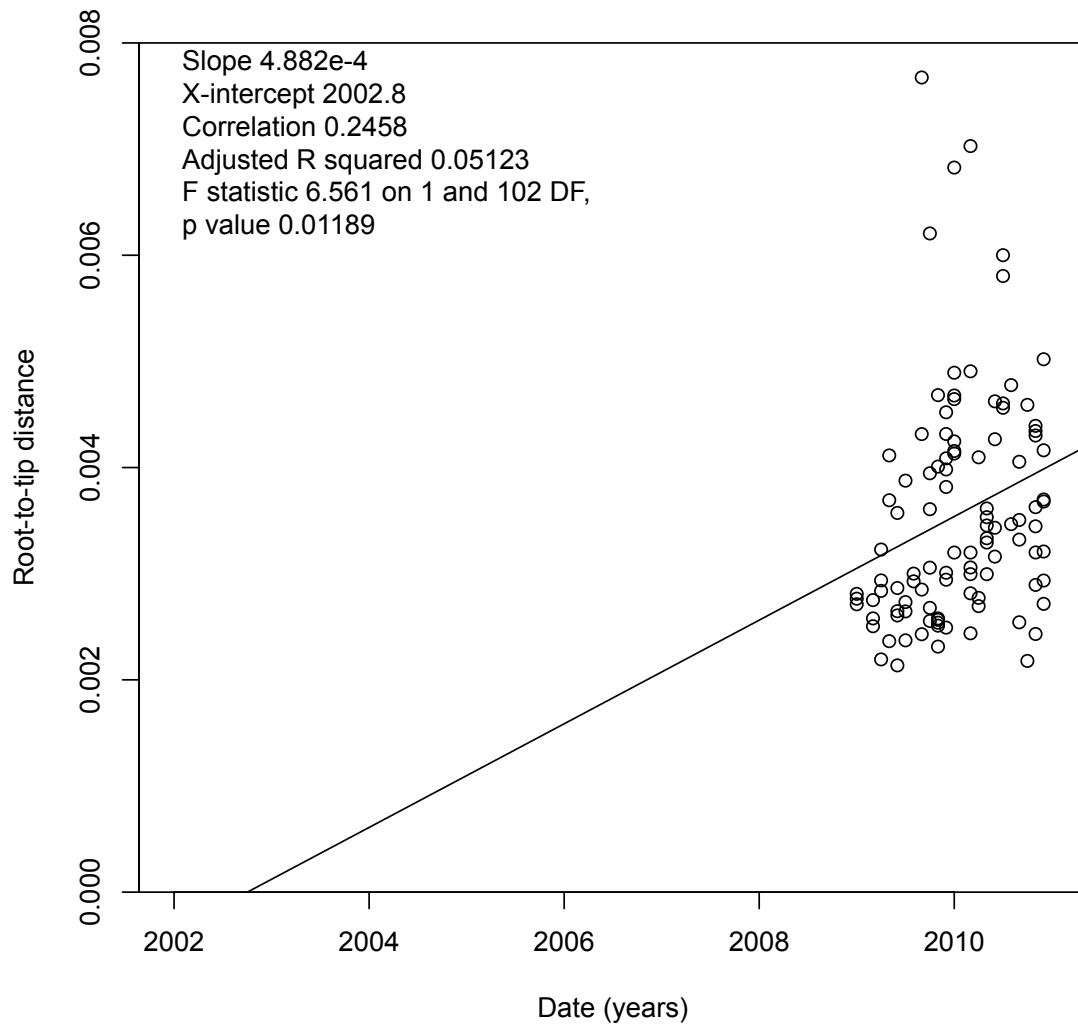

**Figure S4.** Root-to-tip distance by year for all isolates in cluster 1, with linear regression showing that the branching of the isolates in the maximum likelihood phylogeny based on the core-SNPs (Figure 1) demonstrates phylogenetic signal.

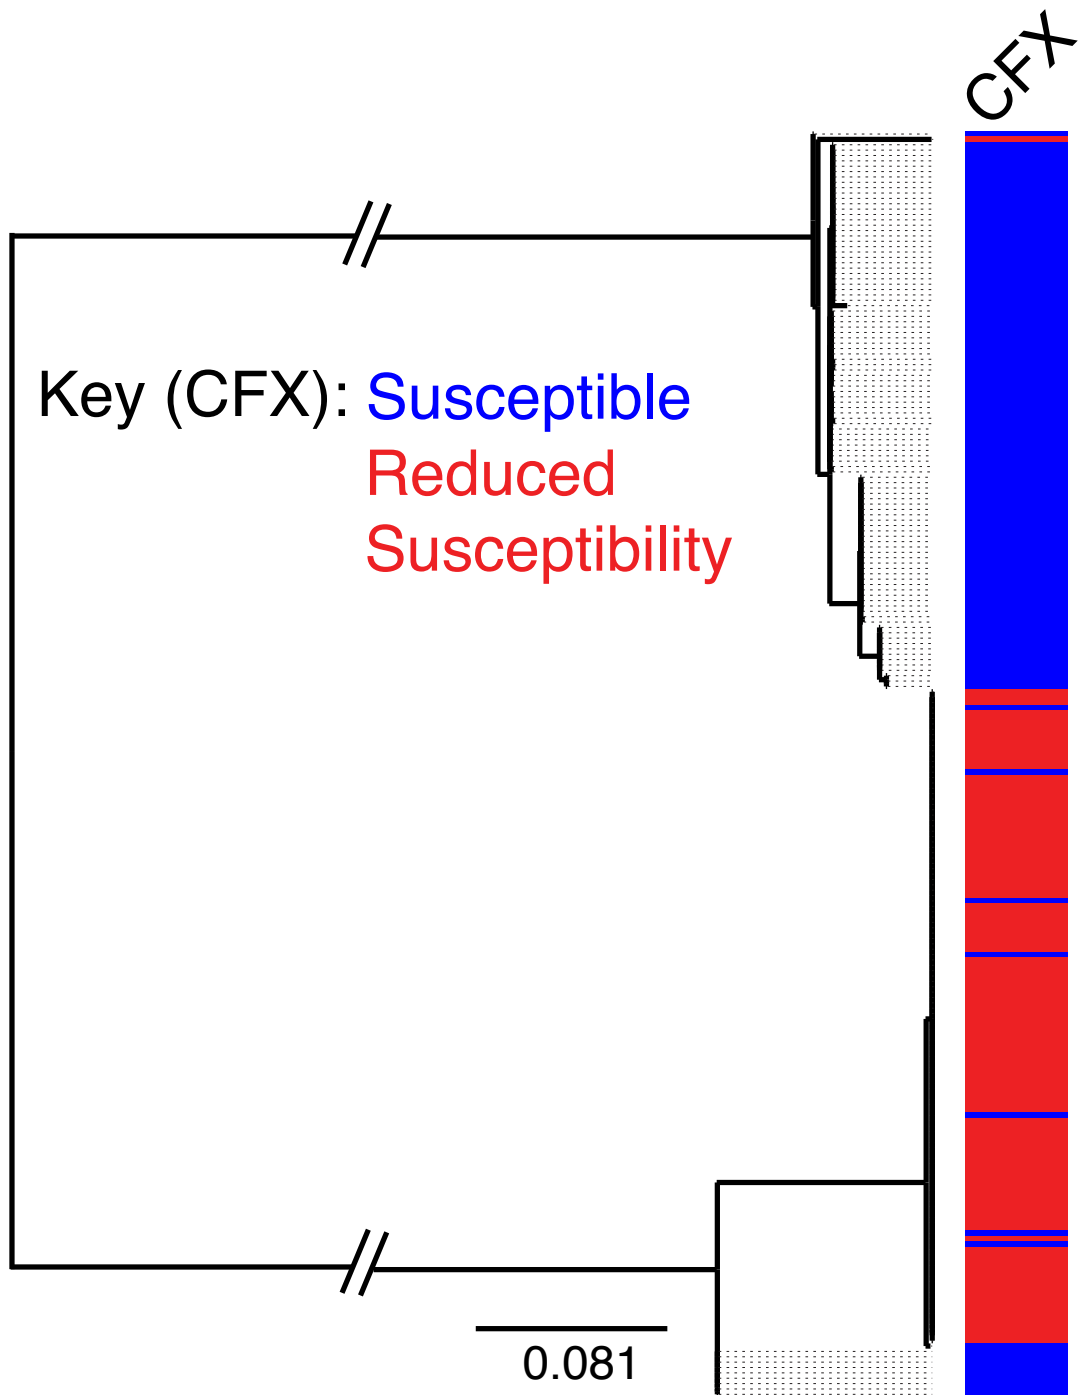

**Figure S5.** Maximum likelihood phylogenies of *penA* with accompanying report of cefixime susceptibility (red) or reduced susceptibility (blue) for each isolate in the column on the right.



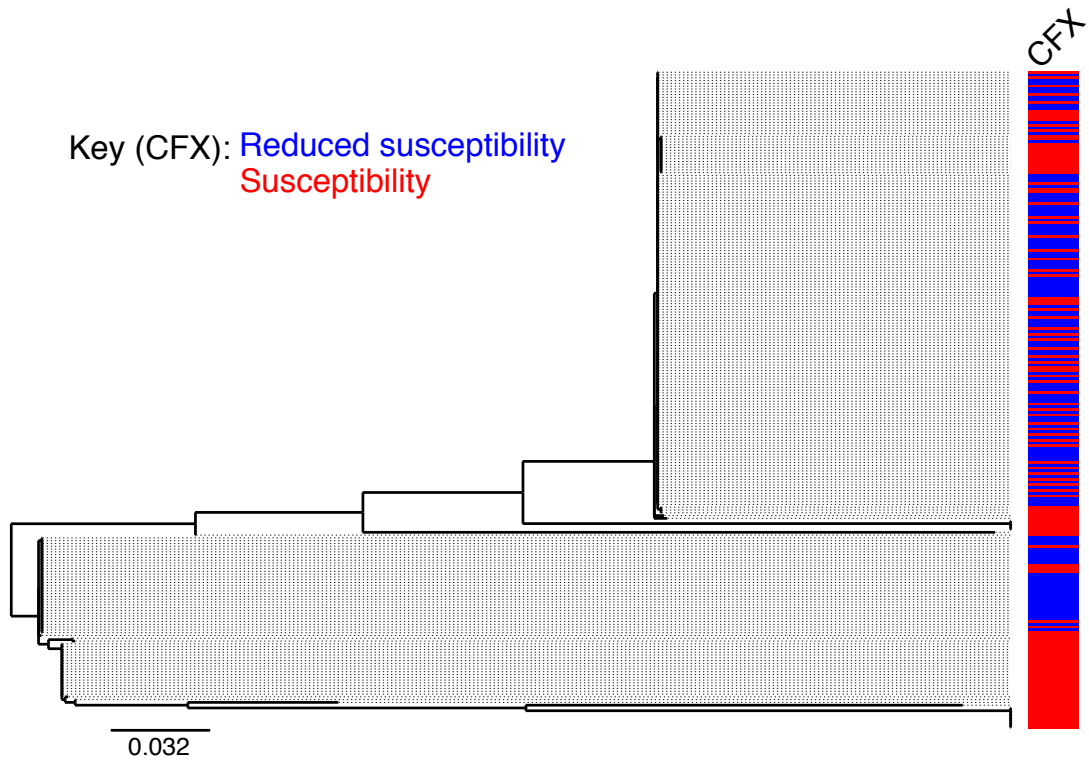

**Figure S6.** Maximum likelihood phylogenies of *mtrR* with accompanying report of cefixime susceptibility (red) or reduced susceptibility (blue) for each isolate in the column on the right.

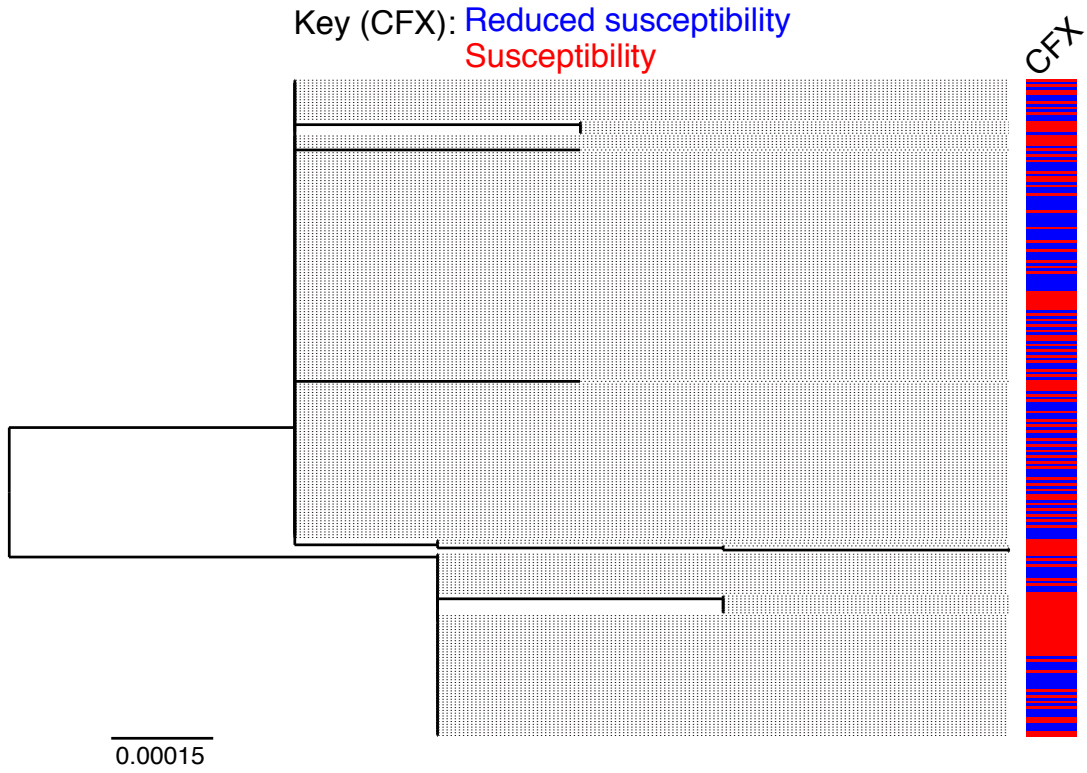

**Figure S7.** Maximum likelihood phylogenies of *ponA* with accompanying report of cefixime susceptibility (red) or reduced susceptibility (blue) for each isolate in the column on the right.

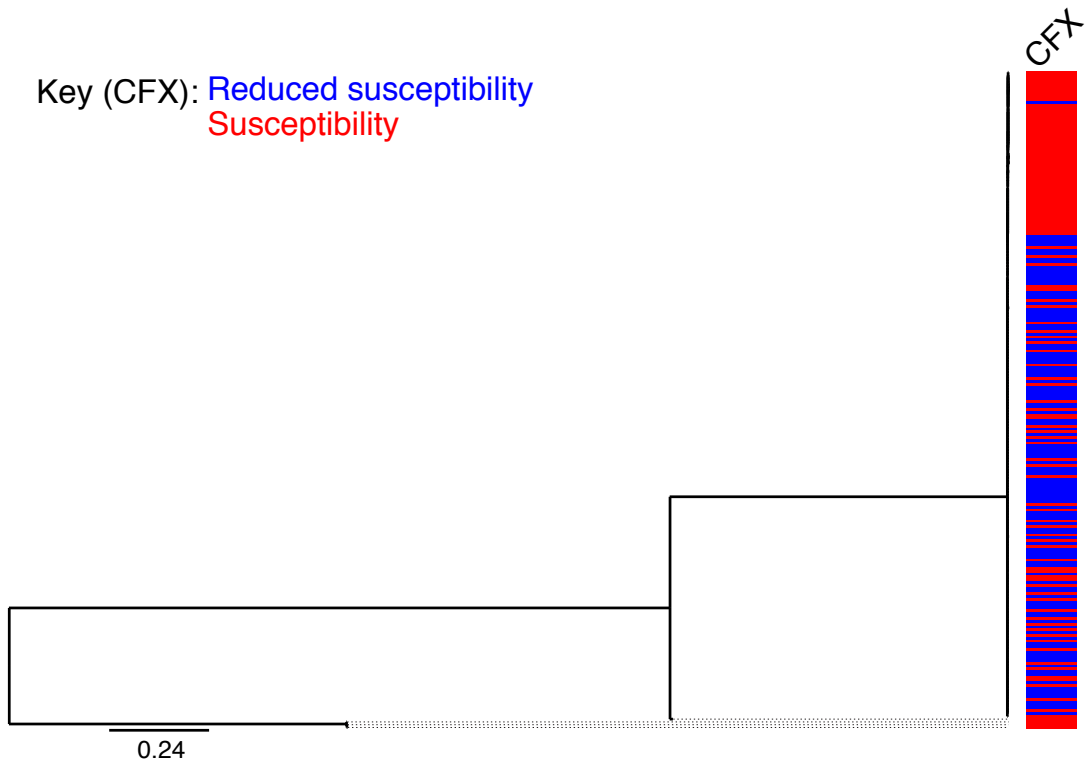

**Figure S8.** Maximum likelihood phylogenies of pilQ with accompanying report of cefixime susceptibility (red) or reduced susceptibility (blue) for each isolate in the column on the right.

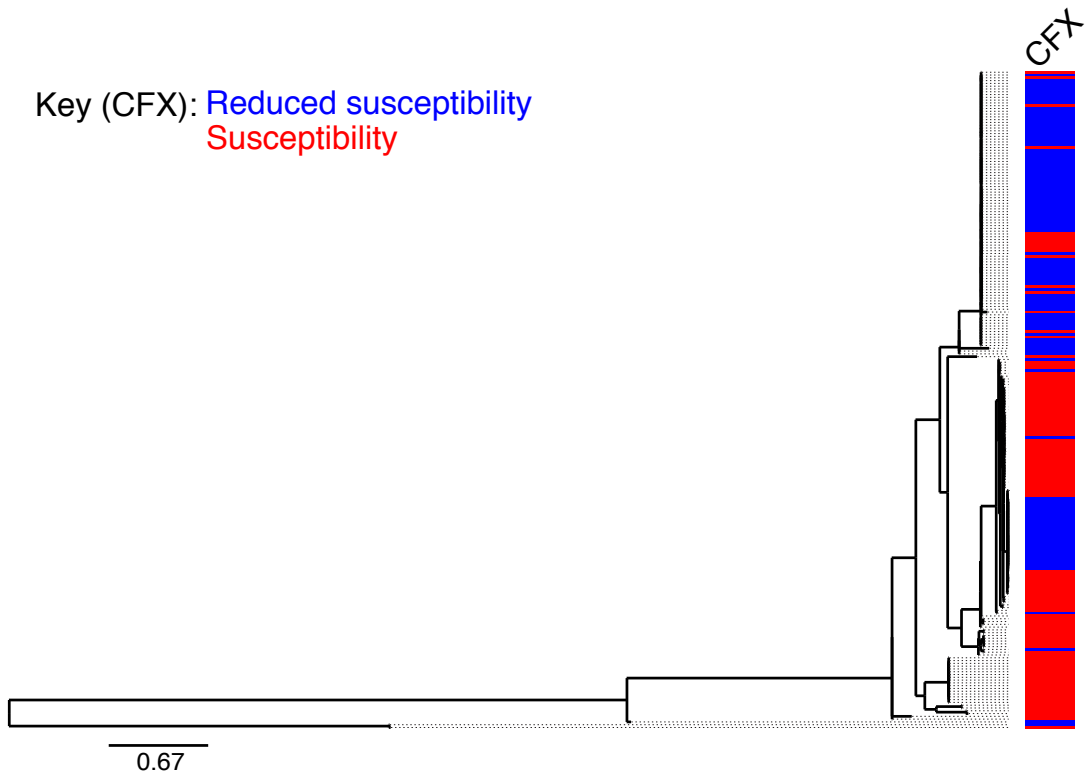

**Figure S9.** Maximum likelihood phylogenies of *porB* with accompanying report of cefixime susceptibility (red) or reduced susceptibility (blue) for each isolate in the column on the right.

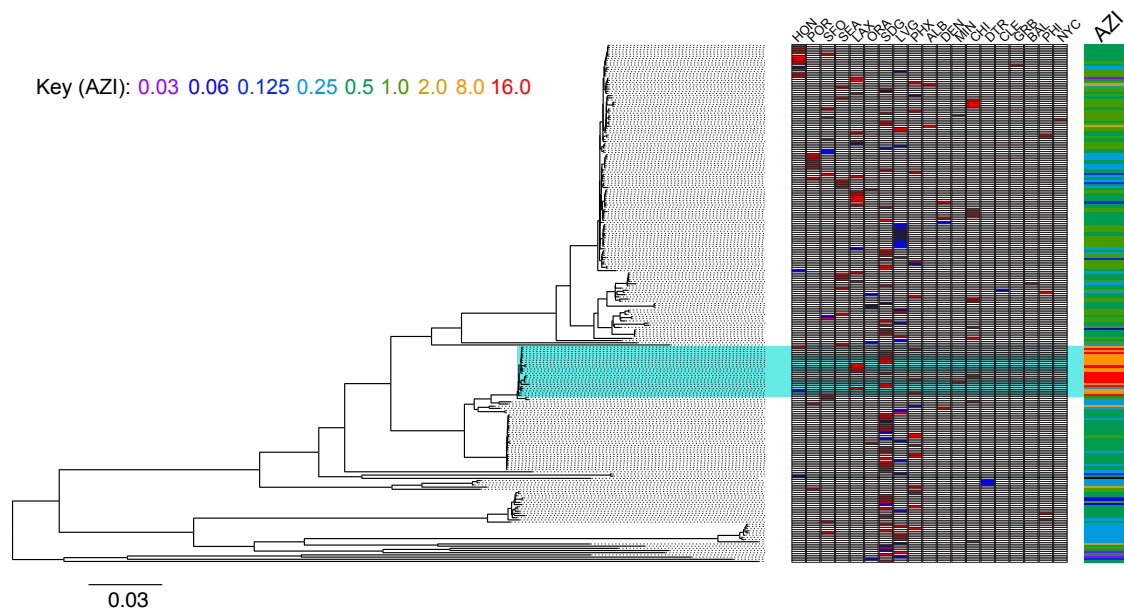

**Figure S10. Maximum likelihood phylogeny from core genome SNPs (predicted recombinations removed).** The geographic location of the clinic of origin for each isolate is denoted in the matrix to the right of the phylogenetic tree, colored according to sexual orientation of the infected individual (red=MSM, blue=MSW). Location abbreviations: HON – Honolulu; POR – Portland; SFO – San Francisco; SEA – Seattle; LAX – Los Angeles; ORA – Orange County; SDG – San Diego; LVG – Las Vegas; PHX – Phoenix; ALB – Albuquerque; DEN – Denver; MIN – Minneapolis; CHI – Chicago; DTR – Detroit; CLE – Cleveland; GRB – Greensborough; BAL – Baltimore; PHI – Philadelphia; NYC – New York City. (C) The azithromycin MIC ( $\mu\text{g}/\text{mL}$ ) is presented in the column on the far right. The cluster of  $\text{azi}^{\text{RS}}$  isolates is indicated in the blue highlighted region.

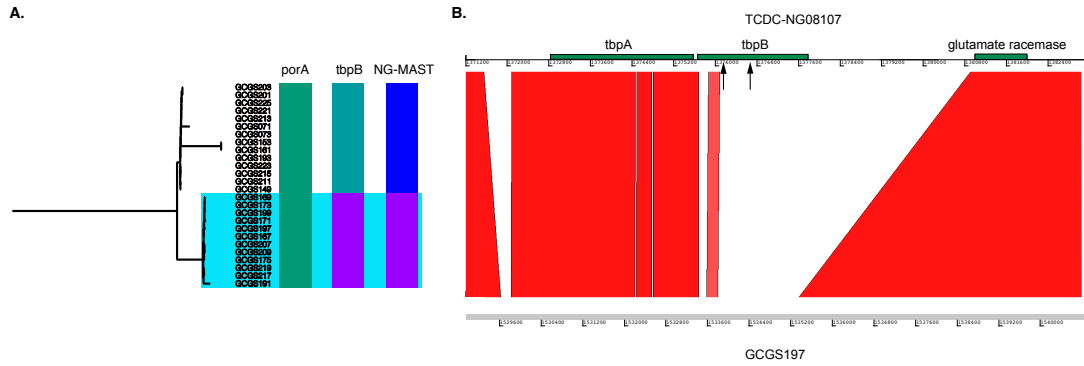

**Figure S11.** A. Phylogeny of *cef<sup>RS</sup>* cluster 2 based on full SNP set. The clade highlighted in blue identifies those that share the null *tbpB* allele (see Supplemental Figure 2). B. Comparison of the genome sequence for the reference genome TCDC-NG08107 and GCGS197, a representative isolate from the branch with null *tbpB* allele as seen in (A), showing recombination at the *tbpB* locus. The red blocks indicate homologous sequence. The sequence for *tbpA*, *tbpB*, and glutamate racemase are noted in the TCDC-NG08107 track. The arrows indicate the locations of the primers (forward primer 5' end at 1376716 and reverse primer 5' end at 1376138 in TCDC-NG08107 numbering).

**Supplemental Table 1**

| Sample  | YEAR | clinic | SEXOR2 | B_LAC | PEN  | TETRACY | SPCTINO | CFX   | CRO   | CIPRO | CPD   | AZI   | MLST | porB           | tbpB           | NG-MAST | CFX | Cluster | Notes                                               |
|---------|------|--------|--------|-------|------|---------|---------|-------|-------|-------|-------|-------|------|----------------|----------------|---------|-----|---------|-----------------------------------------------------|
| GCGS001 | 2009 | CHI    | MSM    | 2     | 4    | 4       | 1       | 0.25  | 0.125 | 16    | 2     | 1     | 1901 | 908            | 110            | 1407    | RS  | 1       |                                                     |
| GCGS002 | 2009 | CHI    | MSM    | 2     | 1    | 4       | 1       | 0.015 | 0.03  | 16    | 0.06  | 1     | 1901 | 1582           | 4              | 6712    | S   |         |                                                     |
| GCGS003 | 2009 | CHI    | MSM    | 2     | 4    | 4       | 1       | 0.25  | 0.125 | 16    | 1     | 1     | 1901 | 908            | 110            | 1407    | RS  | 1       |                                                     |
| GCGS004 | 2009 | CHI    | MSM    | 2     | 2    | 4       | 1       | 0.015 | 0.03  | 16    | 0.06  | 1     | 1901 | 99%_Allele3745 | 4              | Unknown | S   |         |                                                     |
| GCGS005 | 2009 | CHI    | MSM    | 2     | 4    | 4       | 1       | 0.5   | 0.06  | 16    | 1     | 1     | 1901 | 99%_Allele3013 | 110            | Unknown | RS  | 1       |                                                     |
| GCGS006 | 2009 | CHI    | MSM    | 2     | 2    | 1       | 1       | 0.015 | 0.03  | 8     | 0.06  | 1     | 8110 | 1417           | 4              | 2265    | S   |         |                                                     |
| GCGS007 | 2009 | CHI    | MSM    | 2     | 2    | 2       | 1       | 0.25  | 0.06  | 16    | 1     | 0.5   | 1901 | 3025           | 110            | 4986    | RS  | 1       |                                                     |
| GCGS008 | 2009 | CHI    | MSM    | 2     | 0.5  | 16      | 1       | 0.015 | 0.008 | 1     | 0.03  | 0.25  | 1588 | 3403           | 743            | New     | S   |         |                                                     |
| GCGS009 | 2009 | DEN    | MSM    | 2     | 1    | 2       | 1       | 0.25  | 0.03  | 0.015 | 0.25  | 0.25  | 8126 | 301            | 29             | 359     | RS  | -       | Novel mosaic                                        |
| GCGS010 | 2009 | LVG    | MSM    | 2     | 0.25 | 0.5     | 1       | 0.015 | 0.015 | 0.015 | 0.03  | 0.5   | 1580 | 99%_Allele1986 | 29             | Unknown | S   |         |                                                     |
| GCGS011 | 2009 | DTR    | MSW    | 2     | 2    | 0.5     | 1       | 0.25  | 0.06  | 0.015 | 1     | 0.25  | 1893 | 586            | 25             | 860     | S   |         | Rechecked CFX MIC as per supplemental table 2: 0.06 |
| GCGS012 | 2009 | DTR    | MSW    | 2     | 1    | 0.5     | 1       | 0.06  | 0.06  | 0.015 | 0.25  | 0.25  | 1893 | 97%_Allele3680 | 96%_Allele1456 | Unknown | S   |         |                                                     |
| GCGS017 | 2009 | HON    | MSM    | 2     | 4    | 4       | 1       | 0.25  | 0.06  | 32    | 2     | 1     | 1901 | 908            | 110            | 1407    | RS  | 1       |                                                     |
| GCGS018 | 2009 | HON    | MSM    | 2     | 0.25 | 1       | 1       | 0.015 | 0.008 | 0.015 | 0.015 | 8     | 9363 | 1808           | 29             | 2992    | S   |         |                                                     |
| GCGS019 | 2009 | HON    | MSM    | 2     | 4    | 4       | 1       | 0.25  | 0.06  | 32    | 2     | 1     | 1901 | 908            | 110            | 1407    | RS  | 1       |                                                     |
| GCGS020 | 2009 | SDG    | MSM    | 2     | 1    | 0.5     | 1       | 0.015 | 0.008 | 2     | 0.03  | 0.5   | 1579 | 105            | 21             | 286     | S   |         |                                                     |
| GCGS021 | 2009 | HON    | MSM    | 2     | 4    | 2       | 1       | 0.25  | 0.06  | 32    | 2     | 1     | 1901 | 908            | 110            | 1407    | RS  | 1       |                                                     |
| GCGS022 | 2009 | SDG    | MSM    | 2     | 4    | 4       | 1       | 0.06  | 0.06  | 16    | 0.125 | 0.5   | 1901 | 4              | 4              | 225     | S   |         |                                                     |
| GCGS023 | 2009 | HON    | MSW    | 2     | 2    | 2       | 1       | 0.25  | 0.03  | 16    | 0.5   | 0.5   | 1901 | 543            | 110            | 1405    | RS  | 1       |                                                     |
| GCGS024 | 2009 | HON    | MSW    | 1     | 16   | 16      | 1       | 0.06  | 0.06  | 4     | 0.125 | 0.5   | 7823 | 543            | 110            | 1405    | S   |         |                                                     |
| GCGS025 | 2009 | HON    | MSM    | 2     | 2    | 2       | 1       | 0.25  | 0.06  | 16    | 1     | 0.5   | 1901 | 908            | 110            | 1407    | RS  | 1       |                                                     |
| GCGS026 | 2009 | SDG    | MSM    | 2     | 8    | 4       | 1       | 0.06  | 0.06  | 16    | 0.25  | 0.5   | 1901 | 99%_Allele223  | 5              | Unknown | S   |         |                                                     |
| GCGS027 | 2009 | HON    | MSM    | 2     | 2    | 4       | 1       | 0.25  | 0.03  | 32    | 1     | 0.5   | 1901 | 908            | 110            | 1407    | RS  | 1       |                                                     |
| GCGS028 | 2009 | SDG    | MSM    | 2     | 0.5  | 2       | 1       | 0.015 | 0.008 | 8     | 0.06  | 1     | 1901 | 908            | 110            | 1407    | S   |         |                                                     |
| GCGS029 | 2009 | HON    | MSM    | 2     | 2    | 4       | 1       | 0.25  | 0.06  | 32    | 1     | 0.5   | 1901 | 908            | 110            | 1407    | RS  | 1       |                                                     |
| GCGS030 | 2009 | SDG    | MSM    | 2     | 0.5  | 2       | 1       | 0.015 | 0.008 | 8     | 0.06  | 1     | 1901 | 908            | 110            | 1407    | S   |         |                                                     |
| GCGS031 | 2009 | HON    | MSM    | 2     | 2    | 4       | 1       | 0.5   | 0.03  | 32    | 2     | 0.5   | 1901 | 908            | 110            | 1407    | RS  | 1       |                                                     |
| GCGS032 | 2009 | SDG    | MSM    | 2     | 4    | 2       | 1       | 0.03  | 0.03  | 16    | 0.125 | 0.5   | 1901 | 2329           | 4              | New     | S   |         |                                                     |
| GCGS033 | 2009 | LAX    | MSW    | 2     | 4    | 4       | 1       | 0.25  | 0.06  | 16    | 1     | 0.25  | 1901 | 1388           | 110            | 2212    | RS  | 1       |                                                     |
| GCGS034 | 2009 | ORA    | MSW    | 2     | 2    | 2       | 1       | 0.06  | 0.06  | 32    | 0.125 | 1     | 7371 | 3522           | 29             | 7155    | S   |         |                                                     |
| GCGS035 | 2009 | LAX    | MSW    | 2     | 4    | 4       | 1       | 0.25  | 0.125 | 32    | 2     | 1     | 1901 | 99%_Allele1914 | 110            | Unknown | RS  | 1       |                                                     |
| GCGS036 | 2009 | ORA    | MSW    | 2     | 2    | 1       | 1       | 0.03  | 0.015 | 16    | 0.06  | 0.5   | 1901 | 1678           | 1169           | New     | S   |         |                                                     |
| GCGS037 | 2009 | LAX    | MSM    | 2     | 2    | 4       | 1       | 0.5   | 0.125 | 32    | 2     | 0.5   | 1901 | 908            | 110            | 1407    | RS  | 1       |                                                     |
| GCGS038 | 2009 | LAX    | MSM    | 2     | 0.5  | 1       | 1       | 0.015 | 0.008 | 0.015 | 0.015 | 8     | 9363 | 1808           | 29             | 2992    | S   |         |                                                     |
| GCGS039 | 2009 | LVG    | MSW    | 2     | 4    | 4       | 1       | 0.25  | 0.125 | 16    | 2     | 1     | 1901 | 99%_Allele2147 | 110            | Unknown | RS  | 1       |                                                     |
| GCGS040 | 2009 | LVG    | MSW    | 1     | 16   | 16      | 1       | 0.03  | 0.03  | 16    | 0.125 | 0.125 | 7823 | 543            | 29             | 1288    | S   |         |                                                     |
| GCGS041 | 2009 | LVG    | MSM    | 2     | 4    | 4       | 1       | 0.25  | 0.125 | 16    | 2     | 1     | 1901 | 908            | 110            | 1407    | RS  | 1       |                                                     |

|         |      |     |     |   |      |      |   |       |       |       |       |      |      |                |      |         |    |   |
|---------|------|-----|-----|---|------|------|---|-------|-------|-------|-------|------|------|----------------|------|---------|----|---|
| GCGS042 | 2009 | LVG | MSM | 2 | 4    | 4    | 1 | 0.06  | 0.06  | 8     | 0.125 | 1    | 1901 | 14             | 4    | 437     | S  |   |
| GCGS043 | 2009 | LVG | MSW | 2 | 4    | 2    | 1 | 0.25  | 0.06  | 16    | 1     | 1    | 1901 | 99%_Allele2147 | 110  | Unknown | RS | 1 |
| GCGS044 | 2009 | LVG | MSW | 2 | 4    | 4    | 1 | 0.06  | 0.06  | 16    | 0.125 | 0.5  | 1901 | 99%_Allele866  | 4    | Unknown | S  |   |
| GCGS045 | 2009 | LVG | MSW | 2 | 2    | 2    | 1 | 0.25  | 0.06  | 16    | 0.5   | 1    | 1901 | 99%_Allele2147 | 110  | Unknown | RS | 1 |
| GCGS046 | 2009 | LVG | MSW | 2 | 4    | 4    | 1 | 0.06  | 0.03  | 16    | 0.5   | 1    | 1901 | 99%_Allele2147 | 110  | Unknown | S  |   |
| GCGS047 | 2009 | LVG | MSW | 2 | 4    | 4    | 1 | 0.25  | 0.06  | 16    | 1     | 1    | 1901 | 99%_Allele2147 | 110  | Unknown | RS | 1 |
| GCGS048 | 2009 | LVG | MSW | 2 | 4    | 4    | 1 | 0.06  | 0.06  | 16    | 1     | 1    | 1901 | 99%_Allele2147 | 110  | Unknown | S  |   |
| GCGS049 | 2009 | LVG | MSW | 2 | 2    | 4    | 1 | 0.25  | 0.06  | 16    | 1     | 1    | 1901 | 99%_Allele2147 | 110  | Unknown | RS | 1 |
| GCGS050 | 2009 | LVG | MSW | 2 | 0.25 | 0.25 | 1 | 0.015 | 0.008 | 0.015 | 0.015 | 0.03 | 8154 | 4754           | 16   | 7949    | S  |   |
| GCGS051 | 2009 | LVG | MSW | 2 | 2    | 2    | 1 | 0.25  | 0.06  | 16    | 1     | 0.5  | 1901 | 99%_Allele2147 | 110  | Unknown | RS | 1 |
| GCGS052 | 2009 | LVG | MSW | 2 | 2    | 2    | 1 | 0.03  | 0.06  | 8     | 0.125 | 0.5  | 1901 | 14             | 4    | 437     | S  |   |
| GCGS053 | 2009 | LVG | MSW | 2 | 2    | 4    | 1 | 0.25  | 0.125 | 16    | 1     | 1    | 1901 | 99%_Allele1914 | 110  | Unknown | RS | 1 |
| GCGS054 | 2009 | LVG | MSW | 2 | 2    | 4    | 1 | 0.06  | 0.06  | 16    | 0.125 | 1    | 1901 | 14             | 4    | 437     | S  |   |
| GCGS055 | 2009 | PHI | MSM | 2 | 2    | 2    | 1 | 0.25  | 0.06  | 16    | 1     | 1    | 1901 | 908            | 110  | 1407    | RS | 1 |
| GCGS056 | 2009 | PHI | MSM | 2 | 2    | 2    | 1 | 0.06  | 0.06  | 8     | 0.06  | 0.5  | 1901 | 260            | 4    | 3169    | S  |   |
| GCGS057 | 2009 | PHX | MSM | 2 | 2    | 2    | 1 | 0.25  | 0.06  | 16    | 1     | 0.5  | 1901 | 1914           | 110  | 3158    | RS | 1 |
| GCGS058 | 2009 | PHX | MSM | 2 | 2    | 2    | 1 | 0.03  | 0.03  | 16    | 0.125 | 0.5  | 1901 | 14             | 1514 | 8258    | S  |   |
| GCGS059 | 2009 | PHX | MSM | 2 | 4    | 4    | 1 | 0.25  | 0.125 | 16    | 2     | 1    | 1901 | 2237           | 110  | 3709    | RS | 1 |
| GCGS060 | 2009 | PHX | MSM | 2 | 4    | 2    | 1 | 0.06  | 0.06  | 8     | 0.125 | 0.5  | 1901 | 2329           | 4    | New     | S  |   |
| GCGS061 | 2009 | POR | MSM | 2 | 4    | 2    | 1 | 0.5   | 0.06  | 32    | 1     | 0.5  | 1901 | 1914           | 110  | 3158    | RS | 1 |
| GCGS062 | 2009 | POR | MSM | 2 | 0.5  | 1    | 1 | 0.015 | 0.015 | 4     | 0.03  | 0.25 | 1580 | 59             | 29   | 730     | S  |   |
| GCGS063 | 2009 | POR | MSM | 2 | 2    | 4    | 1 | 0.25  | 0.06  | 16    | 1     | 0.5  | 1901 | 1900           | 110  | 3128    | RS | 1 |
| GCGS064 | 2009 | POR | MSM | 2 | 4    | 32   | 1 | 0.06  | 0.03  | 0.015 | 0.25  | 1    | 1893 | 14             | 4    | 437     | S  |   |
| GCGS065 | 2009 | POR | MSM | 2 | 2    | 4    | 1 | 0.25  | 0.06  | 16    | 1     | 0.5  | 1901 | 1900           | 110  | 3128    | RS | 1 |
| GCGS066 | 2009 | LVG | MSM | 2 | 1    | 4    | 1 | 0.015 | 0.008 | 8     | 0.125 | 1    | 1901 | 908            | 110  | 1407    | S  |   |
| GCGS067 | 2009 | SDG | MSM | 2 | 4    | 2    | 1 | 0.25  | 0.125 | 16    | 1     | 0.5  | 1901 | 1903           | 110  | 3149    | RS | 1 |
| GCGS068 | 2009 | SDG | MSM | 2 | 1    | 2    | 1 | 0.015 | 0.008 | 8     | 0.06  | 0.5  | 1901 | 908            | 110  | 1407    | S  |   |
| GCGS069 | 2009 | SDG | MSW | 2 | 4    | 4    | 1 | 0.25  | 0.125 | 16    | 1     | 1    | 1901 | 99%_Allele1914 | 110  | Unknown | RS | 1 |
| GCGS070 | 2009 | SDG | MSW | 2 | 1    | 1    | 1 | 0.03  | 0.015 | 4     | 0.06  | 0.5  | 1901 | 4016           | 33   | 6734    | S  |   |
| GCGS071 | 2009 | SDG | MSM | 2 | 0.5  | 1    | 1 | 0.25  | 0.03  | 0.015 | 0.5   | 0.5  | 1580 | 2700           | 110  | 5895    | RS | 2 |
| GCGS072 | 2009 | SDG | MSM | 2 | 0.5  | 0.25 | 1 | 0.015 | 0.008 | 0.015 | 0.03  | 0.5  | 6712 | 19             | 27   | 7468    | S  |   |
| GCGS073 | 2009 | SDG | MSM | 2 | 1    | 0.5  | 1 | 0.25  | 0.06  | 0.015 | 0.5   | 0.25 | 1580 | 2700           | 110  | 5895    | RS | 2 |
| GCGS074 | 2009 | SDG | MSM | 2 | 0.5  | 0.5  | 1 | 0.015 | 0.008 | 0.015 | 0.03  | 0.25 | 1583 | 35             | 18   | 766     | S  |   |
| GCGS075 | 2009 | SDG | MSM | 2 | 2    | 2    | 1 | 0.25  | 0.06  | 8     | 1     | 0.5  | 1901 | 908            | 110  | 1407    | RS | 1 |
| GCGS076 | 2009 | SDG | MSM | 2 | 1    | 2    | 1 | 0.015 | 0.008 | 8     | 0.06  | 0.25 | 1901 | 908            | 110  | 1407    | S  |   |
| GCGS077 | 2009 | SDG | MSW | 2 | 4    | 2    | 1 | 0.25  | 0.06  | 16    | 2     | 1    | 1901 | 2684           | 110  | 4378    | RS | 1 |
| GCGS078 | 2009 | SDG | MSW | 2 | 0.25 | 0.25 | 1 | 0.015 | 0.008 | 4     | 0.015 | 0.06 | 1901 | 3022           | 28   | New     | S  |   |
| GCGS079 | 2009 | SEA | MSM | 2 | 2    | 1    | 1 | 0.25  | 0.06  | 16    | 2     | 0.5  | 1901 | 1914           | 110  | 3158    | RS | 1 |
| GCGS080 | 2009 | SEA | MSM | 2 | 4    | 4    | 1 | 0.015 | 0.06  | 16    | 0.125 | 1    | 1901 | 430            | 4    | 690     | S  |   |



|         |      |     |     |   |      |     |   |       |       |       |       |       |      |                |                |         |    |   |                                                                    |
|---------|------|-----|-----|---|------|-----|---|-------|-------|-------|-------|-------|------|----------------|----------------|---------|----|---|--------------------------------------------------------------------|
| GCGS081 | 2009 | SEA | MSM | 2 | 2    | 1   | 1 | 0.25  | 0.06  | 16    | 1     | 0.125 | 1901 | 1914           | 110            | 3158    | RS | 1 |                                                                    |
| GCGS082 | 2009 | SEA | MSM | 2 | 2    | 2   | 1 | 0.06  | 0.06  | 16    | 0.125 | 0.25  | 1902 | 1053           | 107            | 3449    | S  |   |                                                                    |
| GCGS083 | 2009 | SFO | MSM | 2 | 2    | 2   | 1 | 0.25  | 0.03  | 0.03  | 0.125 | 0.5   | 9363 | 908            | 29             | 3935    | S  |   | Rechecked CFX MIC as per supplemental table 2: 0.03                |
| GCGS084 | 2009 | SFO | MSM | 2 | 2    | 4   | 1 | 0.015 | 0.015 | 0.015 | 0.25  | 1     | 9363 | 908            | 29             | 3935    | S  |   |                                                                    |
| GCGS085 | 2009 | SFO | MSM | 2 | 2    | 2   | 1 | 0.25  | 0.03  | 32    | 1     | 0.5   | 1901 | 2763           | 110            | 4533    | RS | 1 |                                                                    |
| GCGS086 | 2009 | SFO | MSM | 2 | 2    | 1   | 1 | 0.03  | 0.015 | 4     | 0.03  | 1     | 1901 | 105            | 4              | 1440    | S  |   |                                                                    |
| GCGS087 | 2009 | SFO | MSW | 2 | 2    | 4   | 1 | 0.25  | 0.03  | 32    | 1     | 0.5   | 1901 | 2078           | 110            | 3431    | RS | 1 |                                                                    |
| GCGS088 | 2009 | SFO | MSW | 2 | 0.5  | 0.5 | 1 | 0.06  | 0.008 | 0.015 | 0.015 | 0.5   | 1901 | 2078           | 110            | 3431    | S  |   |                                                                    |
| GCGS089 | 2009 | SFO | MSM | 2 | 2    | 16  | 1 | 0.25  | 0.03  | 32    | 2     | 1     | 1901 | 908            | 110            | 1407    | RS | 1 |                                                                    |
| GCGS090 | 2009 | SFO | MSM | 1 | 8    | 32  | 1 | 0.015 | 0.008 | 1     | 0.03  | 0.25  | 1588 | 2583           | 743            | 4205    | S  |   |                                                                    |
| GCGS091 | 2010 | CHI | MSM | 2 | 4    | 4   | 1 | 0.25  | 0.06  | 16    | 1     | 1     | 1901 | 99%_Allele3013 | 110            | Unknown | RS | 1 |                                                                    |
| GCGS092 | 2010 | CHI | MSM | 2 | 1    | 1   | 1 | 0.06  | 0.06  | 0.015 | 0.5   | 0.25  | 1580 | 59             | 29             | 730     | S  |   |                                                                    |
| GCGS093 | 2010 | CHI | MSM | 2 | 4    | 4   | 1 | 0.25  | 0.125 | 16    | 1     | 1     | 1901 | 99%_Allele3013 | 110            | Unknown | RS | 1 |                                                                    |
| GCGS094 | 2009 | CHI | MSM | 2 | 2    | 2   | 1 | 0.03  | 0.03  | 8     | 0.125 | 1     | 1901 | 99%_Allele1582 | 4              | Unknown | S  |   |                                                                    |
| GCGS095 | 2010 | CHI | MSM | 2 | 2    | 4   | 1 | 0.25  | 0.06  | 16    | 1     | 1     | 1901 | 908            | 110            | 1407    | RS | 1 |                                                                    |
| GCGS096 | 2010 | CHI | MSM | 2 | 0.5  | 1   | 1 | 0.03  | 0.008 | 0.015 | 0.03  | 16    | 9363 | 1808           | 29             | 2992    | S  |   |                                                                    |
| GCGS097 | 2010 | CHI | MSM | 2 | 2    | 4   | 1 | 0.5   | 0.125 | 16    | 2     | 0.5   | 1901 | 908            | 110            | 1407    | RS | 1 |                                                                    |
| GCGS098 | 2010 | CHI | MSM | 2 | 0.25 | 1   | 1 | 0.03  | 0.008 | 0.015 | 0.03  | 16    | 9363 | 1808           | 29             | 2992    | S  |   |                                                                    |
| GCGS099 | 2010 | CLE | MSW | 2 | 4    | 4   | 1 | 0.5   | 0.25  | 16    | 2     | 1     | 1901 | 14             | 4              | 437     | RS | - | Individual isolate with penA mosaic XXXIV outside clusters 1 and 2 |
| GCGS100 | 2010 | DTR | MSW | 2 | 2    | 1   | 1 | 0.06  | 0.06  | 0.015 | 0.25  | 0.25  | 1893 | 97%_Allele3680 | 96%_Allele1456 | Unknown | S  |   |                                                                    |
| GCGS101 | 2010 | DEN | MSM | 2 | 2    | 2   | 1 | 0.25  | 0.06  | 16    | 2     | 0.125 | 1901 | 908            | 110            | 1407    | RS | 1 |                                                                    |
| GCGS102 | 2010 | ALB | MSM | 2 | 4    | 2   | 1 | 0.06  | 0.03  | 16    | 0.5   | 2     | 1901 | 3003           | 110            | 4951    | S  |   |                                                                    |
| GCGS103 | 2010 | DEN | MSM | 2 | 2    | 4   | 1 | 0.25  | 0.03  | 16    | 1     | 0.5   | 1901 | 908            | 110            | 1407    | RS | 1 |                                                                    |
| GCGS104 | 2010 | ALB | MSM | 2 | 4    | 4   | 1 | 0.06  | 0.03  | 16    | 0.5   | 2     | 1901 | 908            | 110            | 1407    | S  |   |                                                                    |
| GCGS105 | 2010 | DEN | MSW | 2 | 1    | 2   | 1 | 0.25  | 0.06  | 16    | 1     | 0.5   | 1901 | 2623           | 110            | 4269    | RS | 1 |                                                                    |
| GCGS106 | 2010 | PHX | MSW | 2 | 0.5  | 1   | 1 | 0.015 | 0.008 | 0.015 | 0.03  | 8     | 8126 | 301            | 29             | 359     | S  |   |                                                                    |
| GCGS107 | 2010 | GRB | MSM | 2 | 4    | 4   | 1 | 0.25  | 0.125 | 16    | 0.5   | 0.5   | 1901 | 908            | 110            | 1407    | RS | 1 |                                                                    |
| GCGS108 | 2009 | BAL | MSM | 2 | 2    | 4   | 1 | 0.03  | 0.06  | 16    | 0.125 | 0.25  | 1901 | 1259           | 4              | 1978    | S  |   |                                                                    |
| GCGS109 | 2010 | HON | MSM | 2 | 4    | 4   | 1 | 0.25  | 0.06  | 32    | 2     | 0.5   | 1901 | 908            | 110            | 1407    | RS | 1 |                                                                    |
| GCGS110 | 2010 | SFO | MSM | 2 | 0.25 | 1   | 1 | 0.03  | 0.008 | 0.015 | 0.015 | 16    | 9363 | 1808           | 29             | 2992    | S  |   |                                                                    |
| GCGS113 | 2010 | HON | MSM | 2 | 2    | 4   | 1 | 0.25  | 0.03  | 32    | 2     | 0.5   | 1901 | 99%_Allele4576 | 110            | Unknown | RS | 1 |                                                                    |
| GCGS114 | 2009 | SDG | MSM | 2 | 0.25 | 0.5 | 1 | 0.015 | 0.008 | 2     | 0.015 | 0.125 | 1901 | 908            | 110            | 1407    | S  |   |                                                                    |
| GCGS115 | 2010 | HON | MSM | 2 | 4    | 4   | 1 | 0.5   | 0.06  | 16    | 2     | 0.5   | 1901 | 908            | 110            | 1407    | RS | 1 |                                                                    |
| GCGS116 | 2009 | SDG | MSM | 2 | 0.25 | 0.5 | 1 | 0.015 | 0.008 | 4     | 0.015 | 0.06  | 1901 | 4              | 4              | 225     | S  |   |                                                                    |
| GCGS117 | 2010 | HON | MSW | 2 | 1    | 2   | 1 | 0.25  | 0.06  | 16    | 1     | 0.25  | 8129 | 908            | 110            | 1407    | RS | 1 |                                                                    |
| GCGS118 | 2010 | HON | MSW | 2 | 0.25 | 1   | 1 | 0.03  | 0.03  | 0.015 | 0.03  | 8     | 9363 | 99%_Allele1808 | 29             | Unknown | S  |   |                                                                    |
| GCGS119 | 2010 | HON | MSM | 2 | 1    | 2   | 1 | 0.25  | 0.06  | 16    | 1     | 0.25  | 8129 | 908            | 110            | 1407    | RS | 1 |                                                                    |
| GCGS120 | 2009 | SDG | MSM | 2 | 0.25 | 0.5 | 1 | 0.015 | 0.008 | 0.015 | 0.015 | 8     | 9363 | 2577           | 29             | 4198    | S  |   |                                                                    |
| GCGS121 | 2010 | LAX | MSM | 2 | 2    | 2   | 1 | 0.5   | 0.06  | 16    | 4     | 0.5   | 1901 | 908            | 110            | 1407    | RS | 1 |                                                                    |

|         |      |     |     |   |      |      |   |       |       |       |       |      |      |                |     |         |    |   |
|---------|------|-----|-----|---|------|------|---|-------|-------|-------|-------|------|------|----------------|-----|---------|----|---|
| GCGS122 | 2010 | LAX | MSM | 2 | 2    | 2    | 1 | 0.06  | 0.03  | 16    | 0.25  | 0.25 | 1901 | 1259           | 4   | 1978    | S  |   |
| GCGS123 | 2010 | LAX | MSM | 2 | 2    | 2    | 1 | 0.25  | 0.125 | 16    | 2     | 0.5  | 1901 | 908            | 110 | 1407    | RS | 1 |
| GCGS124 | 2010 | LAX | MSM | 2 | 0.25 | 0.25 | 1 | 0.015 | 0.008 | 0.015 | 0.015 | 0.03 | 1901 | 908            | 110 | 1407    | S  |   |
| GCGS125 | 2010 | LAX | MSM | 2 | 4    | 2    | 1 | 0.25  | 0.06  | 16    | 2     | 0.5  | 1901 | 908            | 110 | 1407    | RS | 1 |
| GCGS126 | 2010 | LAX | MSM | 2 | 0.5  | 0.5  | 1 | 0.06  | 0.03  | 0.015 | 0.125 | 0.25 | 9363 | 1808           | 29  | 2992    | S  |   |
| GCGS127 | 2010 | LAX | MSM | 2 | 1    | 0.5  | 1 | 0.25  | 0.03  | 8     | 1     | 0.25 | 1901 | 98%_Allele875  | 110 | Unknown | RS | 1 |
| GCGS128 | 2010 | LAX | MSM | 2 | 0.25 | 0.5  | 1 | 0.03  | 0.008 | 0.015 | 0.03  | 8    | 9363 | 1808           | 29  | 2992    | S  |   |
| GCGS129 | 2010 | LAX | MSM | 2 | 2    | 4    | 1 | 0.25  | 0.03  | 32    | 1     | 0.5  | 1901 | 908            | 110 | 1407    | RS | 1 |
| GCGS130 | 2009 | SDG | MSM | 2 | 2    | 2    | 1 | 0.03  | 0.03  | 16    | 0.125 | 0.5  | 1901 | 1259           | 4   | 1978    | S  |   |
| GCGS131 | 2010 | LAX | MSM | 2 | 2    | 4    | 1 | 0.25  | 0.03  | 32    | 1     | 0.5  | 1901 | 908            | 110 | 1407    | RS | 1 |
| GCGS132 | 2009 | SDG | MSM | 2 | 4    | 2    | 1 | 0.06  | 0.03  | 16    | 0.125 | 0.5  | 1901 | 14             | 4   | 437     | S  |   |
| GCGS133 | 2010 | LAX | MSM | 2 | 2    | 2    | 1 | 0.25  | 0.03  | 32    | 1     | 0.5  | 1901 | 908            | 110 | 1407    | RS | 1 |
| GCGS134 | 2009 | SDG | MSM | 2 | 4    | 2    | 1 | 0.03  | 0.03  | 16    | 0.125 | 0.5  | 1901 | 14             | 4   | 437     | S  |   |
| GCGS135 | 2010 | LAX | MSM | 2 | 2    | 4    | 1 | 0.5   | 0.03  | 16    | 1     | 0.5  | 1901 | 908            | 110 | 1407    | RS | 1 |
| GCGS136 | 2010 | LAX | MSM | 2 | 0.25 | 1    | 1 | 0.03  | 0.008 | 0.015 | 0.03  | 8    | 9363 | 99%_Allele3523 | 29  | Unknown | S  |   |
| GCGS137 | 2010 | LAX | MSM | 2 | 2    | 2    | 1 | 0.25  | 0.06  | 32    | 1     | 0.5  | 1901 | 908            | 110 | 1407    | RS | 1 |
| GCGS138 | 2010 | LAX | MSM | 2 | 0.25 | 1    | 1 | 0.015 | 0.008 | 0.015 | 0.015 | 16   | 9363 | 1808           | 29  | 2992    | S  |   |
| GCGS139 | 2010 | LAX | MSM | 2 | 4    | 4    | 1 | 0.25  | 0.125 | 32    | 2     | 1    | 1901 | 908            | 110 | 1407    | RS | 1 |
| GCGS140 | 2010 | LAX | MSM | 2 | 4    | 4    | 1 | 0.06  | 0.06  | 32    | 0.25  | 1    | 1901 | 1259           | 4   | 1978    | S  |   |
| GCGS141 | 2010 | LVG | MSW | 2 | 4    | 4    | 1 | 0.25  | 0.06  | 16    | 1     | 0.5  | 1901 | 99%_Allele2147 | 110 | Unknown | RS | 1 |
| GCGS142 | 2009 | LVG | MSW | 2 | 0.5  | 1    | 1 | 0.015 | 0.008 | 0.015 | 0.015 | 2    | 1579 | 760            | 33  | 3485    | S  |   |
| GCGS143 | 2010 | LVG | MSW | 2 | 4    | 2    | 1 | 0.25  | 0.125 | 16    | 1     | 0.5  | 1901 | 99%_Allele2147 | 110 | Unknown | RS | 1 |
| GCGS144 | 2009 | LVG | MSW | 2 | 0.5  | 1    | 1 | 0.06  | 0.03  | 0.015 | 0.25  | 0.5  | 1580 | 99%_Allele1986 | 29  | Unknown | S  |   |
| GCGS145 | 2010 | LVG | MSM | 2 | 4    | 4    | 1 | 0.25  | 0.06  | 16    | 1     | 1    | 1901 | 908            | 110 | 1407    | RS | 1 |
| GCGS146 | 2009 | LVG | MSM | 1 | 4    | 16   | 1 | 0.03  | 0.008 | 1     | 0.06  | 0.25 | 1588 | 30             | 743 | 3307    | S  |   |
| GCGS147 | 2010 | LVG | MSW | 2 | 2    | 4    | 1 | 0.25  | 0.125 | 16    | 2     | 1    | 1901 | 99%_Allele2147 | 110 | Unknown | RS | 1 |
| GCGS148 | 2009 | SFO | MSW | 2 | 2    | 1    | 1 | 0.03  | 0.015 | 4     | 0.03  | 0.5  | 1901 | 105            | 4   | 1440    | S  |   |
| GCGS149 | 2010 | LVG | MSW | 2 | 1    | 1    | 1 | 0.25  | 0.03  | 0.015 | 0.25  | 0.5  | 1580 | 2700           | 110 | 5895    | RS | 2 |
| GCGS150 | 2009 | SDG | MSW | 1 | 16   | 32   | 1 | 0.015 | 0.015 | 8     | 0.03  | 0.5  | 1903 | 4270           | 129 | 7132    | S  |   |
| GCGS151 | 2010 | LVG | MSW | 2 | 2    | 2    | 1 | 0.25  | 0.06  | 16    | 1     | 1    | 8129 | 908            | 110 | 1407    | RS | 1 |
| GCGS152 | 2010 | LVG | MSW | 2 | 2    | 2    | 1 | 0.06  | 0.06  | 16    | 0.25  | 0.5  | 7822 | 543            | 186 | 1791    | S  |   |
| GCGS153 | 2010 | LVG | MSW | 2 | 0.5  | 0.5  | 1 | 0.25  | 0.03  | 0.015 | 0.25  | 0.5  | 1580 | 2700           | 110 | 5895    | RS | 2 |
| GCGS154 | 2009 | SDG | MSW | 1 | 32   | 16   | 1 | 0.015 | 0.008 | 4     | 0.015 | 0.5  | 8130 | 90             | 29  | 758     | S  |   |
| GCGS155 | 2010 | MIN | MSM | 2 | 4    | 4    | 1 | 0.25  | 0.125 | 16    | 2     | 1    | 1901 | 908            | 110 | 1407    | RS | 1 |
| GCGS156 | 2010 | MIN | MSM | 2 | 0.25 | 1    | 1 | 0.03  | 0.008 | 0.015 | 0.03  | 16   | 9363 | 99%_Allele4354 | 29  | Unknown | S  |   |
| GCGS157 | 2010 | NYC | MSM | 2 | 8    | 4    | 1 | 0.25  | 0.125 | 16    | 0.5   | 1    | 1901 | 908            | 110 | 1407    | RS | 1 |
| GCGS158 | 2009 | PHI | MSM | 2 | 4    | 2    | 1 | 0.03  | 0.03  | 16    | 0.125 | 0.25 | 1901 | 14             | 4   | 437     | S  |   |
| GCGS159 | 2010 | ORA | MSM | 2 | 2    | 2    | 1 | 0.25  | 0.06  | 8     | 1     | 0.5  | 1901 | 908            | 110 | 1407    | RS | 1 |
| GCGS160 | 2009 | SDG | MSM | 2 | 0.25 | 2    | 1 | 0.015 | 0.008 | 8     | 0.06  | 1    | 1901 | 908            | 110 | 1407    | S  |   |

|         |      |     |     |   |      |      |   |       |       |       |       |      |      |                |          |         |    |   |
|---------|------|-----|-----|---|------|------|---|-------|-------|-------|-------|------|------|----------------|----------|---------|----|---|
| GCGS161 | 2010 | ORA | MSM | 2 | 0.5  | 0.5  | 1 | 0.25  | 0.03  | 0.015 | 0.5   | 0.5  | 1580 | 2700           | 110      | 5895    | RS | 2 |
| GCGS162 | 2009 | SDG | MSM | 1 | 1    | 0.5  | 1 | 0.015 | 0.008 | 0.015 | 0.015 | 0.5  | 8152 | 19             | 25       | 5268    | S  |   |
| GCGS163 | 2010 | PHI | MSM | 2 | 4    | 4    | 1 | 0.25  | 0.25  | 16    | 2     | 0.5  | 1901 | 2078           | 110      | 3431    | RS | 1 |
| GCGS164 | 2009 | PHI | MSM | 2 | 4    | 2    | 1 | 0.03  | 0.03  | 16    | 0.125 | 0.25 | 1901 | 4              | 29       | 2493    | S  |   |
| GCGS165 | 2010 | PHX | MSM | 2 | 2    | 4    | 1 | 0.25  | 0.06  | 16    | 1     | 1    | 1901 | 908            | 110      | 1407    | RS | 1 |
| GCGS166 | 2009 | PHX | MSM | 2 | 1    | 2    | 1 | 0.015 | 0.008 | 8     | 0.06  | 1    | 1901 | 908            | 110      | 1407    | S  |   |
| GCGS167 | 2010 | PHX | MSM | 2 | 1    | 1    | 1 | 0.25  | 0.03  | 0.015 | 0.5   | 0.5  | 1580 | 2700           | alt_tpbB | Unknown | RS | 2 |
| GCGS168 | 2010 | PHX | MSM | 2 | 4    | 4    | 1 | 0.06  | 0.06  | 16    | 0.25  | 1    | 1901 | 4              | 4        | 225     | S  |   |
| GCGS169 | 2010 | PHX | MSM | 2 | 1    | 1    | 1 | 0.25  | 0.03  | 0.015 | 0.5   | 0.5  | 1580 | 2700           | alt_tpbB | Unknown | RS | 2 |
| GCGS170 | 2010 | PHX | MSM | 2 | 4    | 4    | 1 | 0.06  | 0.06  | 16    | 0.25  | 0.5  | 1901 | 4              | 4        | 225     | S  |   |
| GCGS171 | 2010 | PHX | MSM | 2 | 1    | 1    | 1 | 0.25  | 0.06  | 0.015 | 0.5   | 0.5  | 1580 | 2700           | alt_tpbB | Unknown | RS | 2 |
| GCGS172 | 2010 | PHX | MSM | 2 | 1    | 1    | 1 | 0.015 | 0.008 | 0.015 | 0.03  | 2    | 1893 | 3716           | 25       | 6306    | S  |   |
| GCGS173 | 2010 | PHX | MSM | 2 | 1    | 1    | 1 | 0.25  | 0.06  | 0.015 | 0.5   | 1    | 1580 | 2700           | alt_tpbB | Unknown | RS | 2 |
| GCGS174 | 2010 | PHX | MSM | 2 | 0.25 | 1    | 1 | 0.03  | 0.008 | 0.015 | 0.015 | 16   | 9363 | 1808           | 29       | 2992    | S  |   |
| GCGS175 | 2010 | PHX | MSM | 2 | 1    | 1    | 1 | 0.25  | 0.06  | 0.015 | 0.5   | 0.5  | 1580 | 2700           | alt_tpbB | Unknown | RS | 2 |
| GCGS176 | 2010 | PHX | MSM | 2 | 0.25 | 1    | 1 | 0.015 | 0.008 | 0.015 | 0.015 | 16   | 9363 | 99%_Allele3381 | 29       | Unknown | S  |   |
| GCGS177 | 2010 | PHX | MSW | 2 | 1    | 1    | 1 | 0.25  | 0.03  | 4     | 0.25  | 1    | 1901 | 7              | 110      | New     | RS | 1 |
| GCGS178 | 2010 | PHX | MSW | 2 | 1    | 2    | 1 | 0.03  | 0.015 | 16    | 0.25  | 1    | 1901 | 908            | 110      | 1407    | S  |   |
| GCGS179 | 2010 | POR | MSM | 2 | 2    | 2    | 1 | 0.5   | 0.06  | 16    | 1     | 0.25 | 1901 | 1900           | 110      | 3128    | RS | 1 |
| GCGS180 | 2009 | LVG | MSM | 2 | 1    | 16   | 1 | 0.015 | 0.015 | 2     | 0.06  | 0.25 | 1588 | 5014           | 743      | New     | S  |   |
| GCGS181 | 2010 | POR | MSM | 2 | 1    | 2    | 1 | 0.5   | 0.125 | 16    | 1     | 0.25 | 1901 | 1900           | 110      | 3128    | RS | 1 |
| GCGS182 | 2009 | LVG | MSM | 2 | 1    | 1    | 1 | 0.015 | 0.008 | 4     | 0.03  | 0.5  | 1579 | 105            | 21       | 286     | S  |   |
| GCGS183 | 2010 | POR | MSM | 2 | 1    | 2    | 1 | 0.25  | 0.06  | 16    | 1     | 0.25 | 1901 | 1900           | 110      | 3128    | RS | 1 |
| GCGS184 | 2009 | LVG | MSM | 1 | 16   | 0.25 | 1 | 0.015 | 0.008 | 2     | 0.015 | 0.03 | 1582 | 35             | 944      | 4424    | S  |   |
| GCGS185 | 2010 | POR | MSM | 2 | 2    | 2    | 1 | 0.25  | 0.06  | 16    | 1     | 0.25 | 1901 | 1900           | 110      | 3128    | RS | 1 |
| GCGS186 | 2009 | LVG | MSM | 1 | 8    | 64   | 1 | 0.03  | 0.03  | 2     | 0.06  | 0.25 | 1588 | 997            | 743      | New     | S  |   |
| GCGS187 | 2010 | POR | MSM | 2 | 2    | 2    | 1 | 0.25  | 0.125 | 16    | 1     | 0.25 | 1901 | 1900           | 110      | 3128    | RS | 1 |
| GCGS188 | 2009 | LVG | MSM | 2 | 0.25 | 16   | 1 | 0.03  | 0.015 | 1     | 0.03  | 0.25 | 1588 | 1142           | 743      | New     | S  |   |
| GCGS189 | 2010 | SDG | MSM | 2 | 4    | 2    | 1 | 0.25  | 0.06  | 16    | 2     | 1    | 1901 | 2780           | 110      | 4556    | RS | 1 |
| GCGS190 | 2010 | SDG | MSM | 2 | 4    | 4    | 1 | 0.03  | 0.03  | 16    | 0.25  | 1    | 1901 | 4              | 135      | 1861    | S  |   |
| GCGS191 | 2010 | SDG | MSM | 2 | 1    | 1    | 1 | 0.25  | 0.03  | 0.015 | 0.5   | 0.5  | 1580 | 2700           | alt_tpbB | Unknown | RS | 2 |
| GCGS192 | 2010 | SDG | MSM | 2 | 0.5  | 1    | 1 | 0.03  | 0.008 | 0.015 | 0.03  | 2    | 9363 | 1808           | 29       | 2992    | S  |   |
| GCGS193 | 2010 | SDG | MSW | 2 | 0.5  | 1    | 1 | 0.25  | 0.03  | 0.015 | 0.5   | 0.5  | 1580 | 2700           | 110      | 5895    | RS | 2 |
| GCGS194 | 2009 | ORA | MSW | 2 | 1    | 1    | 1 | 0.015 | 0.03  | 4     | 0.06  | 0.5  | 1901 | 4016           | 33       | 6734    | S  |   |
| GCGS195 | 2010 | SDG | MSM | 2 | 4    | 2    | 1 | 0.25  | 0.06  | 16    | 1     | 0.5  | 1901 | 908            | 110      | 1407    | RS | 1 |
| GCGS196 | 2010 | SDG | MSM | 2 | 4    | 4    | 1 | 0.03  | 0.03  | 16    | 0.25  | 1    | 1901 | 14             | 4        | 437     | S  |   |
| GCGS197 | 2010 | SDG | MSM | 2 | 1    | 1    | 1 | 0.25  | 0.015 | 0.015 | 0.5   | 0.5  | 1580 | 2700           | alt_tpbB | Unknown | RS | 2 |
| GCGS198 | 2009 | SDG | MSM | 2 | 0.25 | 1    | 1 | 0.015 | 0.008 | 0.015 | 0.015 | 16   | 9363 | 2577           | 29       | 4198    | S  |   |
| GCGS199 | 2010 | SDG | MSW | 2 | 1    | 1    | 1 | 0.25  | 0.015 | 0.015 | 0.5   | 0.5  | 1580 | 2700           | alt_tpbB | Unknown | RS | 2 |

|         |      |     |     |   |      |      |   |       |       |       |       |       |      |                |          |         |    |   |
|---------|------|-----|-----|---|------|------|---|-------|-------|-------|-------|-------|------|----------------|----------|---------|----|---|
| GCGS200 | 2009 | ORA | MSW | 2 | 0.25 | 0.25 | 1 | 0.015 | 0.015 | 0.015 | 0.015 | 0.125 | 6722 | 99%_Allele521  | 5        | Unknown | S  |   |
| GCGS201 | 2010 | SDG | MSM | 2 | 1    | 1    | 1 | 0.25  | 0.015 | 0.015 | 0.5   | 0.5   | 1580 | 2700           | 110      | 5895    | RS | 2 |
| GCGS202 | 2009 | SDG | MSM | 2 | 0.25 | 0.5  | 1 | 0.03  | 0.008 | 0.015 | 0.015 | 8     | 9363 | 2577           | 29       | 4198    | S  |   |
| GCGS203 | 2010 | SDG | MSM | 2 | 1    | 1    | 1 | 0.25  | 0.06  | 0.015 | 0.5   | 0.5   | 1580 | 2700           | 110      | 5895    | RS | 2 |
| GCGS204 | 2010 | SDG | MSM | 2 | 0.25 | 1    | 1 | 0.015 | 0.008 | 0.015 | 0.015 | 8     | 9363 | 95%_Allele5049 | 29       | Unknown | S  |   |
| GCGS205 | 2010 | SDG | MSM | 2 | 4    | 2    | 1 | 0.25  | 0.125 | 16    | 2     | 1     | 1901 | 908            | 110      | 1407    | RS | 1 |
| GCGS206 | 2009 | SDG | MSM | 2 | 0.25 | 0.5  | 1 | 0.015 | 0.008 | 4     | 0.03  | 0.06  | 1901 | 4              | 4        | 225     | S  |   |
| GCGS207 | 2010 | SDG | MSM | 2 | 1    | 1    | 1 | 0.25  | 0.06  | 0.015 | 0.5   | 0.5   | 1580 | 2700           | alt_tpbB | Unknown | RS | 2 |
| GCGS208 | 2009 | SDG | MSM | 2 | 1    | 2    | 1 | 0.015 | 0.015 | 8     | 0.03  | 1     | 1582 | 99%_Allele53   | 21       | Unknown | S  |   |
| GCGS209 | 2010 | SDG | MSM | 2 | 0.5  | 0.5  | 1 | 0.25  | 0.03  | 0.015 | 0.5   | 0.5   | 1580 | 2700           | alt_tpbB | Unknown | RS | 2 |
| GCGS210 | 2009 | PHX | MSM | 2 | 0.5  | 16   | 1 | 0.03  | 0.015 | 1     | 0.06  | 0.25  | 1588 | 30             | 743      | 3307    | S  |   |
| GCGS211 | 2010 | SDG | MSM | 2 | 0.5  | 0.5  | 1 | 0.25  | 0.03  | 0.015 | 0.5   | 0.25  | 1580 | 2700           | 110      | 5895    | RS | 2 |
| GCGS212 | 2009 | SDG | MSM | 2 | 1    | 32   | 1 | 0.03  | 0.015 | 1     | 0.06  | 0.25  | 1588 | 28             | 743      | 4405    | S  |   |
| GCGS213 | 2010 | SDG | MSM | 2 | 1    | 0.5  | 1 | 0.25  | 0.03  | 0.015 | 0.5   | 0.5   | 1580 | 2700           | 110      | 5895    | RS | 2 |
| GCGS214 | 2009 | SDG | MSM | 2 | 0.5  | 0.5  | 1 | 0.015 | 0.008 | 2     | 0.03  | 0.5   | 1579 | 105            | 21       | 286     | S  |   |
| GCGS215 | 2010 | SDG | MSM | 2 | 0.5  | 0.5  | 1 | 0.25  | 0.03  | 0.015 | 0.5   | 0.25  | 1580 | 2700           | 110      | 5895    | RS | 2 |
| GCGS216 | 2009 | SDG | MSM | 1 | 4    | 16   | 1 | 0.015 | 0.015 | 2     | 0.03  | 0.25  | 1588 | 30             | 743      | 3307    | S  |   |
| GCGS217 | 2010 | SDG | MSM | 2 | 1    | 1    | 1 | 0.25  | 0.03  | 0.015 | 0.5   | 0.5   | 1580 | 2700           | alt_tpbB | Unknown | RS | 2 |
| GCGS218 | 2009 | SDG | MSM | 2 | 0.25 | 1    | 1 | 0.015 | 0.008 | 0.015 | 0.015 | 16    | 9363 | 1808           | 29       | 2992    | S  |   |
| GCGS219 | 2010 | SDG | MSM | 2 | 1    | 1    | 1 | 0.25  | 0.03  | 0.015 | 0.5   | 0.5   | 1580 | 2700           | alt_tpbB | Unknown | RS | 2 |
| GCGS220 | 2009 | SDG | MSM | 2 | 0.25 | 0.25 | 1 | 0.015 | 0.008 | 2     | 0.03  | 0.06  | 1579 | 105            | 21       | 286     | S  |   |
| GCGS221 | 2010 | SDG | MSW | 2 | 1    | 0.5  | 1 | 0.25  | 0.03  | 0.015 | 0.5   | 0.5   | 1580 | 2700           | 110      | 5895    | RS | 2 |
| GCGS222 | 2009 | ORA | MSW | 2 | 2    | 1    | 1 | 0.015 | 0.03  | 4     | 0.06  | 0.5   | 1901 | 4016           | 33       | 6734    | S  |   |
| GCGS223 | 2010 | SDG | MSM | 2 | 0.5  | 1    | 1 | 0.25  | 0.03  | 0.015 | 0.5   | 0.5   | 1580 | 2700           | 110      | 5895    | RS | 2 |
| GCGS224 | 2009 | SDG | MSM | 2 | 0.25 | 1    | 1 | 0.015 | 0.008 | 0.015 | 0.015 | 8     | 9363 | 2577           | 29       | 4198    | S  |   |
| GCGS225 | 2010 | SDG | MSM | 2 | 1    | 1    | 1 | 0.25  | 0.03  | 0.015 | 0.5   | 0.5   | 1580 | 2700           | 110      | 5895    | RS | 2 |
| GCGS226 | 2010 | SDG | MSM | 2 | 0.25 | 0.5  | 1 | 0.015 | 0.008 | 0.015 | 0.015 | 16    | 9363 | 99%_Allele3281 | 29       | Unknown | S  |   |
| GCGS227 | 2010 | SDG | MSM | 2 | 4    | 4    | 1 | 0.25  | 0.06  | 16    | 1     | 1     | 1901 | 3960           | 110      | 6632    | RS | 1 |
| GCGS228 | 2009 | PHX | MSM | 2 | 2    | 4    | 1 | 0.015 | 0.015 | 0.015 | 0.06  | 2     | 9363 | 99%_Allele1259 | 29       | Unknown | S  |   |
| GCGS229 | 2010 | SDG | MSM | 2 | 2    | 2    | 1 | 0.25  | 0.06  | 16    | 1     | 0.5   | 1901 | 3960           | 110      | 6632    | RS | 1 |
| GCGS230 | 2010 | SDG | MSM | 2 | 0.25 | 0.5  | 1 | 0.015 | 0.008 | 0.015 | 0.015 | 8     | 9363 | 99%_Allele3381 | 29       | Unknown | S  |   |
| GCGS231 | 2010 | SEA | MSM | 2 | 2    | 1    | 1 | 0.25  | 0.03  | 32    | 0.25  | 0.25  | 1901 | 1914           | 110      | 3158    | RS | 1 |
| GCGS232 | 2010 | SEA | MSM | 2 | 2    | 2    | 1 | 0.06  | 0.03  | 32    | 0.25  | 0.5   | 1901 | 1259           | 4        | 1978    | S  |   |
| GCGS233 | 2010 | SEA | MSM | 2 | 2    | 4    | 1 | 0.25  | 0.06  | 32    | 1     | 0.5   | 1901 | 908            | 110      | 1407    | RS | 1 |
| GCGS234 | 2010 | SEA | MSM | 2 | 2    | 2    | 1 | 0.06  | 0.03  | 32    | 0.25  | 0.5   | 1901 | 1259           | 4        | 1978    | S  |   |
| GCGS235 | 2010 | SEA | MSM | 2 | 2    | 4    | 1 | 0.25  | 0.06  | 16    | 1     | 0.25  | 1901 | 908            | 110      | 1407    | RS | 1 |
| GCGS236 | 2010 | SEA | MSM | 2 | 2    | 2    | 1 | 0.06  | 0.03  | 32    | 0.25  | 0.5   | 1901 | 1259           | 4        | 1978    | S  |   |
| GCGS237 | 2010 | SEA | MSM | 2 | 2    | 4    | 1 | 0.25  | 0.06  | 16    | 1     | 0.25  | 1901 | 908            | 110      | 1407    | RS | 1 |
| GCGS238 | 2009 | SEA | MSM | 2 | 2    | 4    | 1 | 0.06  | 0.03  | 32    | 0.25  | 0.5   | 8129 | 195            | 4        | 1103    | S  |   |

|         |      |     |     |   |     |     |   |      |       |    |      |       |      |               |     |         |    |   |
|---------|------|-----|-----|---|-----|-----|---|------|-------|----|------|-------|------|---------------|-----|---------|----|---|
| GCGS239 | 2010 | SFO | MSM | 2 | 2   | 4   | 1 | 0.5  | 0.125 | 16 | 2    | 0.5   | 1901 | 908           | 110 | 1407    | RS | 1 |
| GCGS240 | 2010 | SFO | MSM | 2 | 2   | 4   | 1 | 0.06 | 0.06  | 32 | 0.25 | 0.5   | 1901 | 250           | 4   | 323     | S  |   |
| GCGS241 | 2010 | SFO | MSM | 2 | 4   | 4   | 1 | 0.5  | 0.125 | 16 | 2    | 0.5   | 1901 | 908           | 110 | 1407    | RS | 1 |
| GCGS242 | 2010 | SFO | MSM | 2 | 0.5 | 0.5 | 1 | 0.06 | 0.015 | 4  | 0.25 | 0.125 | 1901 | 98%_Allele875 | 110 | Unknown | S  |   |

## Supplemental Table S2

| <b>ID</b> | <b>Reported CFX MIC<br/>(mg/mL)</b> | <b>CDC lab retest CFX MIC<br/>(mg/mL)</b> | <b>penA allele</b>      |
|-----------|-------------------------------------|-------------------------------------------|-------------------------|
| GCGS011   | 0.25                                | 0.06                                      | non-mosaic              |
| GCGS083   | 0.25                                | 0.03                                      | non-mosaic              |
| GCGS046   | 0.06                                | 0.06                                      | mosaic penA XXXIV       |
| GCGS048   | 0.06                                | 0.03                                      | mosaic penA XXXIV       |
| GCGS088   | 0.06                                | 0.125                                     | mosaic penA XXXIV       |
| GCGS102   | 0.06                                | 0.125                                     | mosaic penA XXXIV       |
| GCGS104   | 0.06                                | 0.125                                     | mosaic penA XXXIV       |
| GCGS124   | 0.015                               | 0.125                                     | mosaic penA XXXIV       |
| GCGS126   | 0.06                                | 0.125                                     | mosaic penA XXXIV E101D |
| GCGS242   | 0.06                                | 0.125                                     | mosaic penA XXXIV       |
